# Supplementary material
Source: HighWire-hosted journal article supplement (https://bmjopen.bmj.com/content/9/3/e022509)
Supplement: inline-supplementary-material-1 [file inline-supplementary-material-1.pdf]

# Effects of ischemic postconditioning on outcomes of patients with ST-segment elevation myocardial infarction who underwent primary percutaneous coronary intervention: a meta-analysis

Zhenhua Xing<sup>1#</sup>, Liang Tang<sup>1#</sup>, Jiabing Huang<sup>1</sup>, Xiaofan Peng<sup>1</sup>, Xinqun Hu<sup>1\*</sup>

# Co-first author

1 Department of Cardiovascular Medicine, The Second Xiangya Hospital, Central South University, Changsha, Hunan 410011, China

\*Corresponding author: Xinqun Hu, M.D. PhD.

Department of Cardiovascular Medicine, The Second Xiangya Hospital, Central South University, Changsha, Hunan 410011, China

E-mail: huxingun@csu.edu.cn

Phone number: +8615084714930

# PubMed

Search Query Items found

- #1 Search ischemic postconditioning[MeSH Terms] 849
- #2 Search conditioning[Title/Abstract] 55132
- #3 Search percutaneous coronary intervention[MeSH Terms] 46594
- #4 Search PCI[Title/Abstract] 21330
- #5 Search (PCI[Title/Abstract]) OR percutaneous coronary intervention[MeSH Terms] 55884
- #6 Search (conditioning[Title/Abstract]) OR ischemic postconditioning[MeSH Terms] 55763
- #7 Search (((conditioning[Title/Abstract]) OR ischemic postconditioning[MeSH Terms])) AND ((PCI[Title/Abstract]) OR percutaneous coronary intervention[MeSH Terms]) 153

## Supplementary table 1: Sensitivity analysis

| Excluded study    | Heart failure   | MI              | Cardiac death   | All-cause mortality |
|-------------------|-----------------|-----------------|-----------------|---------------------|
| Lønborg 2010      | -               | 0.90(0.25,3.24) | 1.49(0.74,2.99) | 0.90(0.69,1.27)     |
| Garcia 2010       | 0.91(0.62,1.31) | -               | 1.26(0.84,1.91) | 0.95(0.70,1.29)     |
| Freixa 2012       | 0.86(0.58,1.28) | -               | 1.29(0.85,1.95) | 0.96(0.70,1.30)     |
| Tarantini 2012    | 0.85(0.59,1.22) | -               | 1.25(0.83,1.89) | 0.95(0.70,1.29)     |
| Limalanathan 2014 | 0.91(0.63,1.32) | 1.26(0.79,2.00) | -               | 0.94(0.69,1.27)     |
| Hahn 2015         | -               | 0.84(0.25,2.84) | 1.23(0.77,2.03) | 0.90(0.65,1.25)     |
| Eitel 2015        | 0.98(0.66,1.45) | -               | -               | 1.00(0.72,1.38)     |
| Luz 2015          | 0.88(0.61,1.26) | -               | 1.28(0.85,1.93) | 0.94(0.69,1.27)     |
| Engstrøm 2017     | 0.75(0.44,1.28) | 1.20(0.78,1.32) | 1.54(0.78,3.04) | 1.28(0.81,2.00)     |
| Dong 2013         | 0.85(0.59,1.23) | -               | -               | -                   |

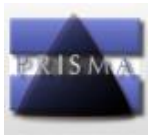

## PRISMA 2009 Flow Diagram

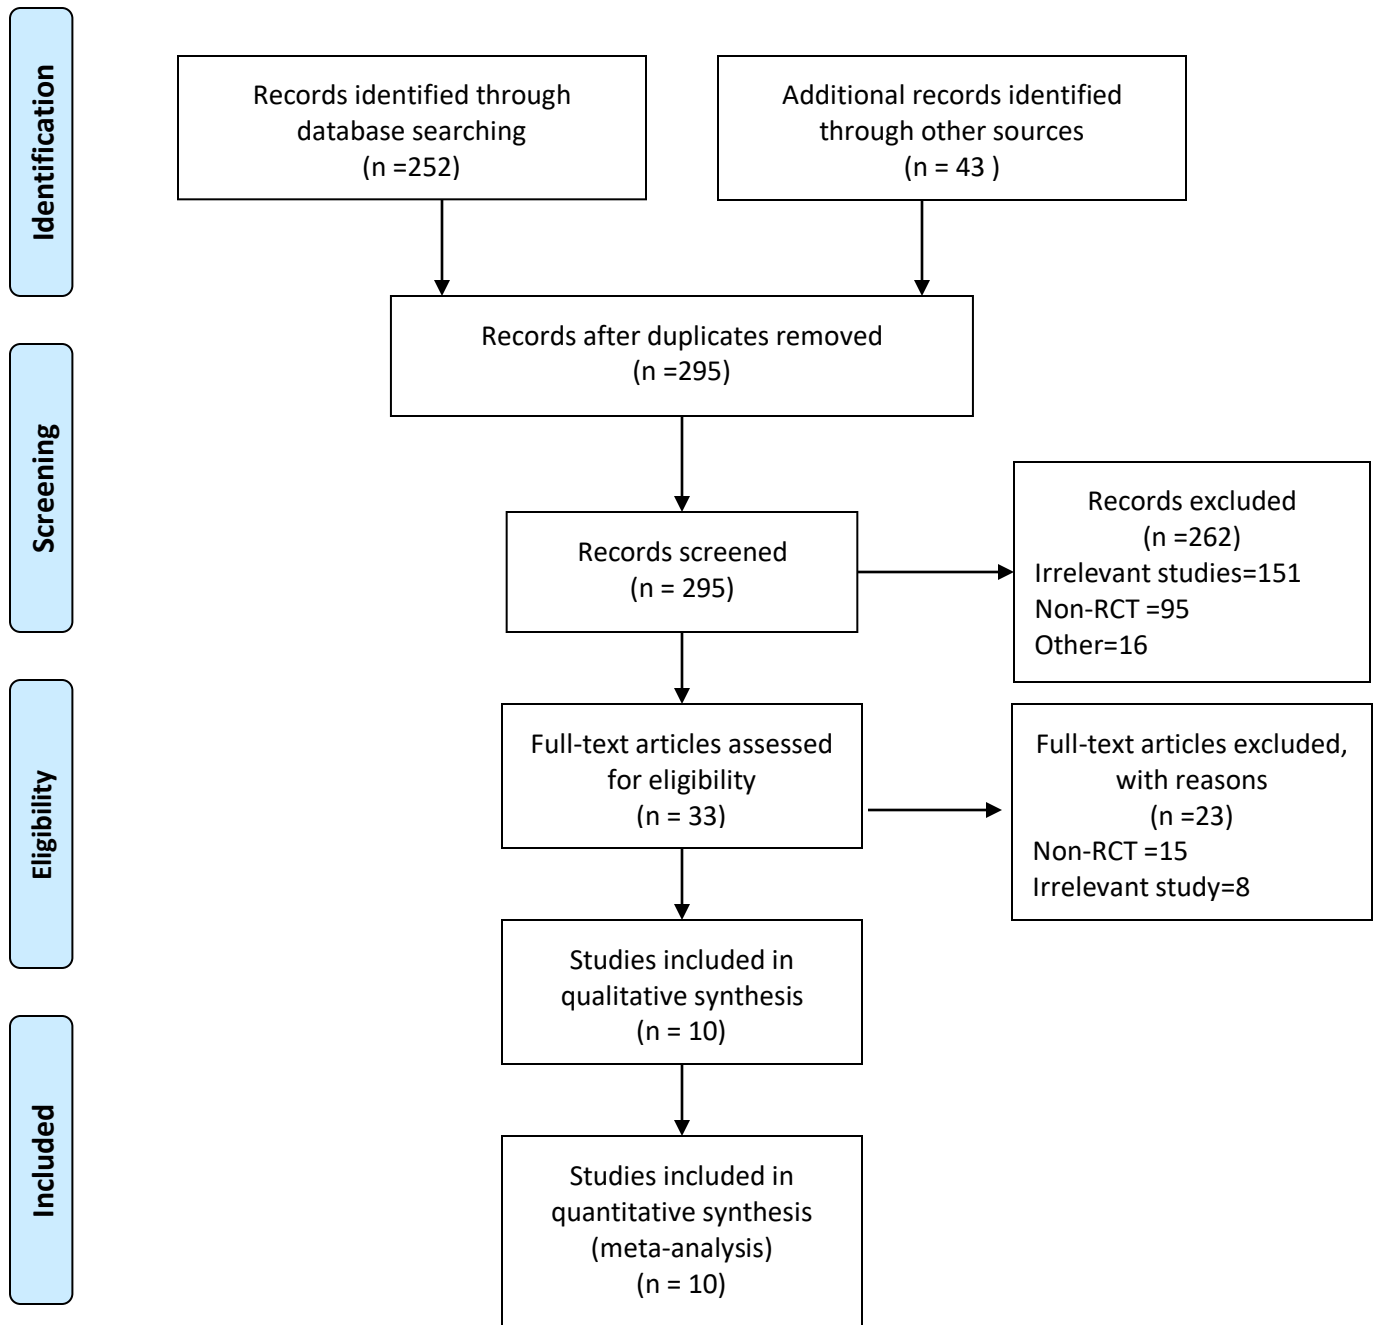

Supplementary Figure 1: Flow diagram of literature searched for meta-analysis.

|                   | Random sequence generation (selection bias) | Allocation concealment (selection bias) | Blinding of participants and personnel (performance bias) | Blinding of outcome assessment (detection bias) | Incomplete outcome data (attrition bias) | Selective reporting (reporting bias) | Other bias |
|-------------------|---------------------------------------------|-----------------------------------------|-----------------------------------------------------------|-------------------------------------------------|------------------------------------------|--------------------------------------|------------|
| Dong 2013         | ?                                           | ?                                       | ?                                                         | ?                                               | +                                        | +                                    | +          |
| Eitel 2015        | +                                           | +                                       | +                                                         | +                                               | +                                        | +                                    | +          |
| Engstrøm 2017     | +                                           | +                                       | +                                                         | +                                               | +                                        | +                                    | +          |
| Freixa 2012       | +                                           | +                                       | +                                                         | +                                               | +                                        | +                                    | +          |
| Garcia 2010       | ?                                           | ?                                       | ?                                                         | ?                                               | +                                        | +                                    | +          |
| Hahn 2015         | +                                           | +                                       | +                                                         | +                                               | +                                        | +                                    | +          |
| Limalanathan 2014 | +                                           | +                                       | ?                                                         | ?                                               | +                                        | +                                    | +          |
| Luz 2015          | +                                           | +                                       | ?                                                         | ?                                               | +                                        | +                                    | +          |
| Lønborg 2010      | +                                           | +                                       | +                                                         | +                                               | +                                        | +                                    | +          |
| Tarantini 2012    | +                                           | +                                       | +                                                         | +                                               | +                                        | +                                    | +          |

Supplementary Fig2. Bias assessment using Cochrane Reviewer's Handbook 4.2
